# Supplementary material
Source: MDPI journal article supplement (https://www.mdpi.com/2313-0105/9/1/14)
Supplement: s1 [file s1]

## Supporting Information

### **Electrocatalytic and Conductive Vanadium Oxide on Carbonized Bacterial Cellulose Aerogel for the Sulfur Cathode in Li-S Batteries**

Xueyan Lin<sup>1</sup>, Wenyue Li<sup>2</sup>, Xuan Pan<sup>3</sup>, Shu Wang<sup>4</sup> and Zhaoyang Fan<sup>2,\*</sup>

<sup>1</sup>School for Engineering of Matter, Transport & Energy, Arizona State University, Tempe, Arizona, 85281, USA

<sup>2</sup>School of Electrical, Computer and Energy Engineering, Arizona State University, Tempe, AZ 85281, USA

<sup>3</sup>Institutes of Science and Development, Chinese Academy of Sciences, Beijing 100190, China

<sup>4</sup>College of Health Solutions, Arizona State University, Phoenix, Arizona, 85004, USA

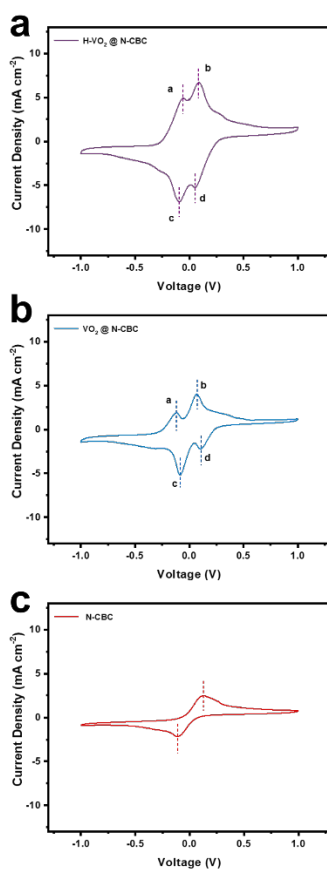

**Figure S1** The CV curves of H-VO<sub>2</sub>@N-CBC, VO<sub>2</sub>@N-CBC, and N-CBC -based electrodes in a symmetric cell with Li<sub>2</sub>S<sub>6</sub> as the electrolyte at the scan rate of 3 mV/s. The redox peaks are labeled as a, b, c, and d, respectively.

### Supplementary Note S1. The details on calculation of activation energy change.

CV tests were performed under a scan rate of 0.2 mV/s at 298 K as shown in Fig 3a. The relationship between the electrode potential and the activation energy is given by the equation (eq. 1) [1,2]:

$$E_a = E_a^0 + \alpha z F \varphi_{(Red)ir}$$

where  $E_a$  is the activation energy of reduction process,  $E_a^0$  is the intrinsic activation energy,  $\alpha$  is the symmetry factor,  $z$  is the charge transfer number,  $F$  is the Faraday's constant,  $\varphi_{(Red)ir}$  is the irreversible potential during the reduction process, which can be read from the peak potential in CV curves during the reduction process.

The Tafel equation (eq. 2):

$$\eta = \frac{RT}{\alpha z F} \ln j_0 - \frac{RT}{\alpha z F} \ln j$$

Where  $\eta$  is the overpotential,  $R$  is the gas constant,  $T$  is the absolute temperature,  $j_0$  is the exchange current density,  $j$  is the current density. The equation can be simplified in a concise form (eq. 3):

$$\eta = a + b \ln j$$

Therefore,  $a$  is the intercept of Tafel curve (eq. 4):

$$a = \frac{RT}{\alpha z F} \ln j_0$$

and  $b$  is the slope of Tafel curve (eq. 5):

$$b = -\frac{RT}{\alpha z F}$$

By substituting Tafel slope (eq. 5) into (eq. 1), we can rewrite a concise form:

$$E_a = E_a^0 - \frac{RT}{b} \varphi_{(Red)ir}$$

Consequently, based on the Tafel slope as shown in Fig. 3 (e and f), the activation energy during discharge (reduction) process can be calculated.

The activation energy corresponds to the reduction from  $S_8$  to  $Li_2S_n$ :

$$\text{N-CBC based electrode: } E_{a1} = E_{a1}^0 - 73.79 \text{ kJ mol}^{-1}$$

$$\text{VO}_2@\text{N-CBC based electrode: } E_{a1}' = E_{a1}^0 - 90.24 \text{ kJ mol}^{-1}$$

$$\text{H-VO}_2@\text{N-CBC based electrode: } E_{a1}'' = E_{a1}^0 - 101.97 \text{ kJ mol}^{-1}$$

The difference in activation energy can be calculated by subtracting the activation energy between two different electrodes:

Activation energy difference between  $\text{VO}_2@\text{N-CBC}$  and N-CBC based electrodes:

$$E_{a1} - E_{a1}' = (E_{a1}^0 - 73.79) \text{ kJ mol}^{-1} - (E_{a1}^0 - 90.24) \text{ kJ mol}^{-1} = 16.45 \text{ kJ mol}^{-1}$$

Activation energy difference between H-VO<sub>2</sub>@N-CBC and VO<sub>2</sub>@N-CBC based electrodes:

$$E_{a1}' - E_{a1}'' = (E_{a1}^0 - 90.24) \text{ kJ mol}^{-1} - (E_{a1}^0 - 101.97) \text{ kJ mol}^{-1} = 11.73 \text{ kJ mol}^{-1}$$

Similarly, we can calculate the relative activation energy among three electrodes from Li<sub>2</sub>S<sub>n</sub> to Li<sub>2</sub>S.

**Table S1.** Comparison of the electrochemical performance of LSBs using different catalytic materials.

| Catalytic materials                               | Sulfur loading (mg/cm <sup>2</sup> ) | Rate capability (mAh/g) | Cycling performance (mAh/g) | Ref.      |
|---------------------------------------------------|--------------------------------------|-------------------------|-----------------------------|-----------|
| VO <sub>2</sub> (R)/V <sub>2</sub> O <sub>3</sub> | 2.5                                  | 957/1C                  | 758/300th (1C)              | This work |
| VN                                                | 1.3–1.5                              | 850/2C                  | ~750/500th(0.5C)            | [3]       |
| VO <sub>2</sub> (P)                               | 2.0                                  | 760/2C                  | 780/500th(2C)               | [4]       |
| VO <sub>2</sub> (B)                               | 1.4–2.0                              | 831/2C                  | 615/200th(2C)               | [5]       |
| Ti <sub>4</sub> O <sub>7</sub>                    | 1.5–1.8                              | 850/2C                  | ~940/100th (0.5C)           | [6]       |
| MnO <sub>2</sub>                                  | 0.7–1.0                              | 950/1C                  | 1030/200th (0.2C)           | [7]       |
| TiO <sub>2</sub> -TiN                             | 1.0–1.2                              | 682/2C                  | 927/300th (0.3C)            | [6]       |
| RuO <sub>2</sub>                                  | 1.5                                  | 543/2C                  | 508/200th (1C)              | [8]       |

1. Hua, W.; Li, H.; Pei, C.; Xia, J.; Sun, Y.; Zhang, C.; Lv, W.; Tao, Y.; Jiao, Y.; Zhang, B.; et al. Selective Catalysis Remedies Polysulfide Shuttling in Lithium-Sulfur Batteries. **2021**, 33, 2101006, doi:<https://doi.org/10.1002/adma.202101006>.
2. Cho, J.; Ryu, S.; Gong, Y.J.; Pyo, S.; Yun, H.; Kim, H.; Lee, J.; Yoo, J.; Kim, Y.S. Nitrogen-doped MoS<sub>2</sub> as a catalytic sulfur host for lithium-sulfur batteries. *Chemical Engineering Journal* **2022**, 439, 135568, doi:<https://doi.org/10.1016/j.cej.2022.135568>.
3. Li, F.; Zhang, M.; Chen, W.; Cai, X.; Rao, H.; Chang, J.; Fang, Y.; Zhong, X.; Yang, Y.; Yang, Z.; et al. Vanadium Nitride Quantum Dots/Holey Graphene Matrix Boosting Adsorption and Conversion Reaction Kinetics for High-Performance Lithium–Sulfur Batteries. *ACS Applied Materials & Interfaces* **2021**, 13, 30746-30755, doi:10.1021/acsami.1c08113.
4. Wang, S.; Liao, J.; Yang, X.; Liang, J.; Sun, Q.; Liang, J.; Zhao, F.; Koo, A.; Kong, F.; Yao, Y.; et al. Designing a highly efficient polysulfide conversion catalyst with paramontroseite for high-performance and long-life lithium-sulfur batteries. *Nano Energy* **2019**, 57, 230-240, doi:<https://doi.org/10.1016/j.nanoen.2018.12.020>.
5. Song, Y.; Zhao, W.; Zhu, X.; Zhang, L.; Li, Q.; Ding, F.; Liu, Z.; Sun, J. Vanadium Dioxide-Graphene Composite with Ultrafast Anchoring Behavior of Polysulfides for Lithium–Sulfur Batteries. *ACS Applied Materials & Interfaces* **2018**, 10, 15733-15741, doi:10.1021/acsami.8b02920.
6. Zhou, T.; Lv, W.; Li, J.; Zhou, G.; Zhao, Y.; Fan, S.; Liu, B.; Li, B.; Kang, F.; Yang, Q.-H. Twinborn TiO<sub>2</sub>-TiN heterostructures enabling smooth trapping–diffusion–conversion of polysulfides towards ultralong life lithium–sulfur batteries. *Energy & Environmental Science* **2017**, 10, 1694-1703, doi:10.1039/C7EE01430A.
7. Liang, X.; Hart, C.; Pang, Q.; Garsuch, A.; Weiss, T.; Nazar, L.F. A highly efficient polysulfide mediator for lithium–sulfur batteries. *Nature Communications* **2015**, 6, 5682, doi:10.1038/ncomms6682.

8. Huang, J.-Q.; Huang, J.; Chong, W.G.; Cui, J.; Yao, S.; Huang, B.; Kim, J.-K. Graphene/RuO<sub>2</sub> nanocrystal composites as sulfur host for lithium-sulfur batteries. *Journal of Energy Chemistry* **2019**, 35, 204-211, doi:<https://doi.org/10.1016/j.jechem.2019.03.017>.
